# Supplementary material for: Enhancing energy migration upconversion through a migratory interlayer in the core–shell–shell nanostructure towards latent fingerprinting
Source: Royal Society of Chemistry journal article supplement (doi:10.1039/d0nr03817b), 2020-01-01
Supplement: d0nr03817b1.pdf [file d0nr03817b1.pdf]

## Supporting Information

### **Enhancing energy migration upconversion through migratory interlayer in core-shell-shell nanostructure towards latent fingerprinting**

Xixi Wang,<sup>a</sup> Long Yan,<sup>a</sup> Songbin Liu,<sup>a</sup> Peng Zhang,<sup>a</sup> Rong Huang,<sup>a</sup> and Bo Zhou<sup>a,\*</sup>

*<sup>a</sup> State Key Laboratory of Luminescent Materials and Devices, Guangdong Provincial Key Laboratory of Fiber Laser Materials and Applied Techniques, and Guangdong Engineering Technology Research and Development Center of Special Optical Fiber Materials and Devices, South China University of Technology, Guangzhou, 510641, China.*

*\*E-mail: zhoubo@scut.edu.cn*

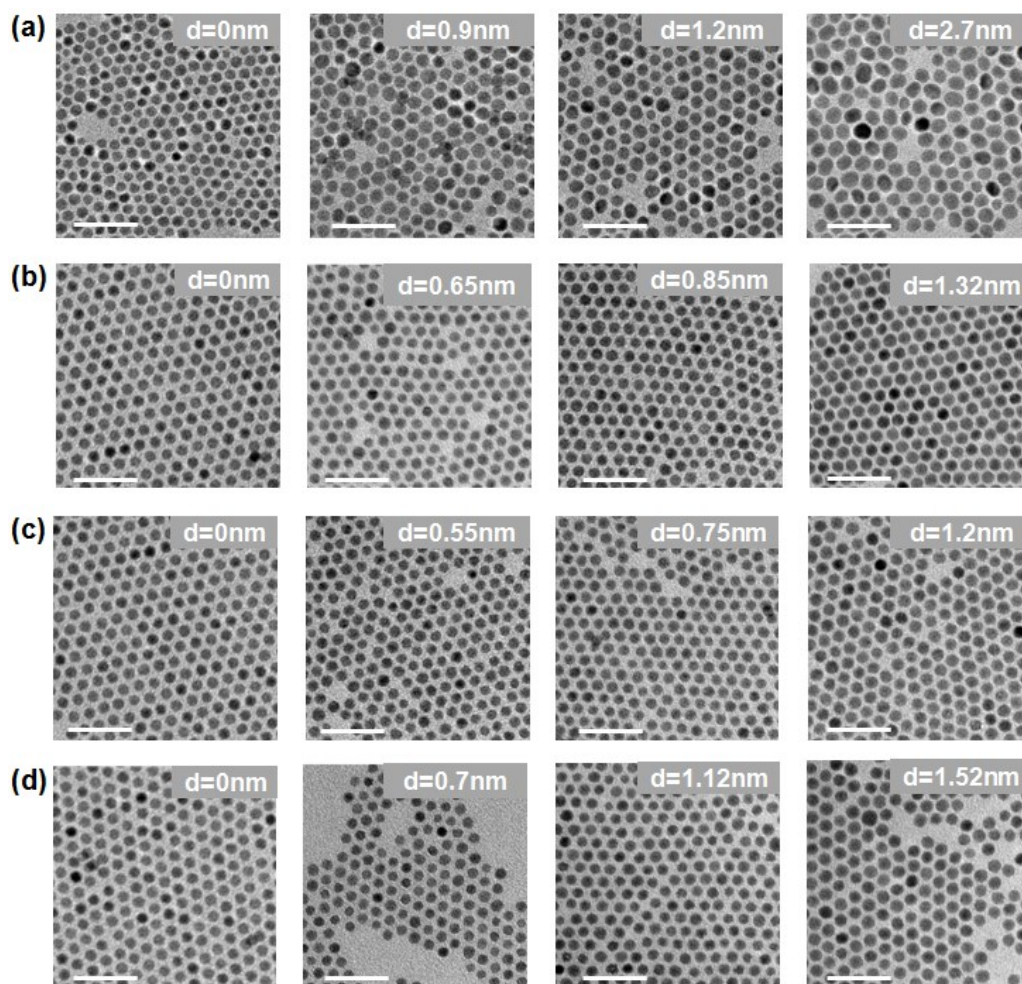

**Figure S1.** TEM images of the samples with a fine tuning of the NaGdF<sub>4</sub> interlayer thickness for various emitters: (a) Sm<sup>3+</sup>, (b) Nd<sup>3+</sup>, (c) Eu<sup>3+</sup> and (d) Tb<sup>3+</sup> in the outermost shell. The corresponding interlayer thickness “d” is given in the images. Scale bars, 50 nm.

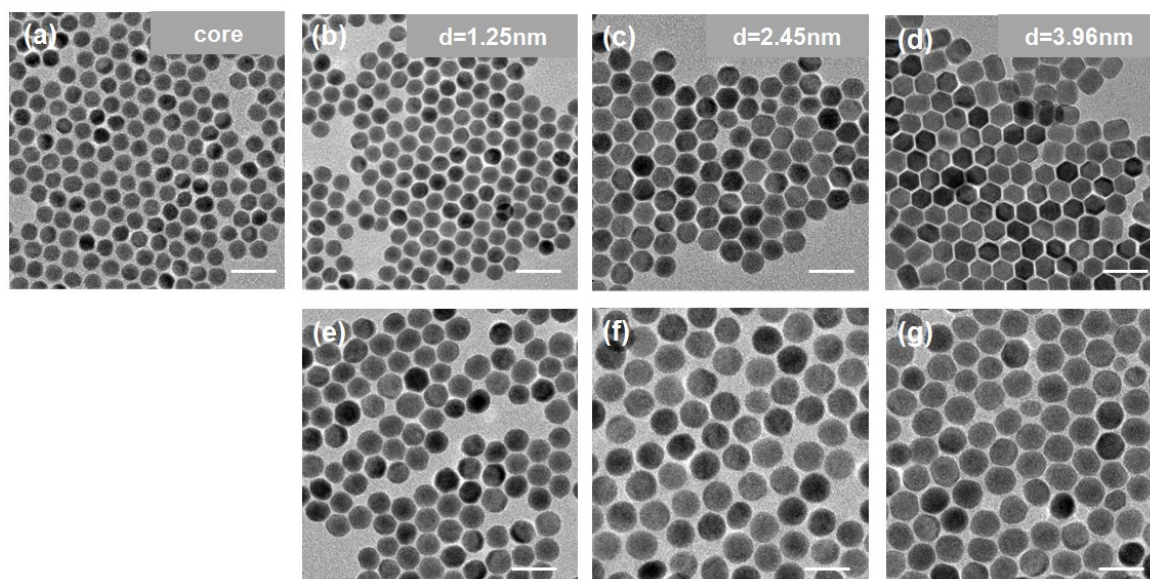

**Figure S2.** TEM images of  $\text{NaGdF}_4\text{:Yb/Tm@NaGdF}_4\text{@NaGdF}_4\text{:Dy}$  core-shell-shell nanoparticles with  $\text{NaGdF}_4$  thickness of (b) 1.25 nm, (c) 2.45 nm, (d) 3.96 nm and their resultant core-shell-shell nanoparticles (e-g), respectively. Note that (a) shows the  $\text{NaGdF}_4\text{:Yb/Tm}$  core seeds for comparison. Scale bars, 100 nm.

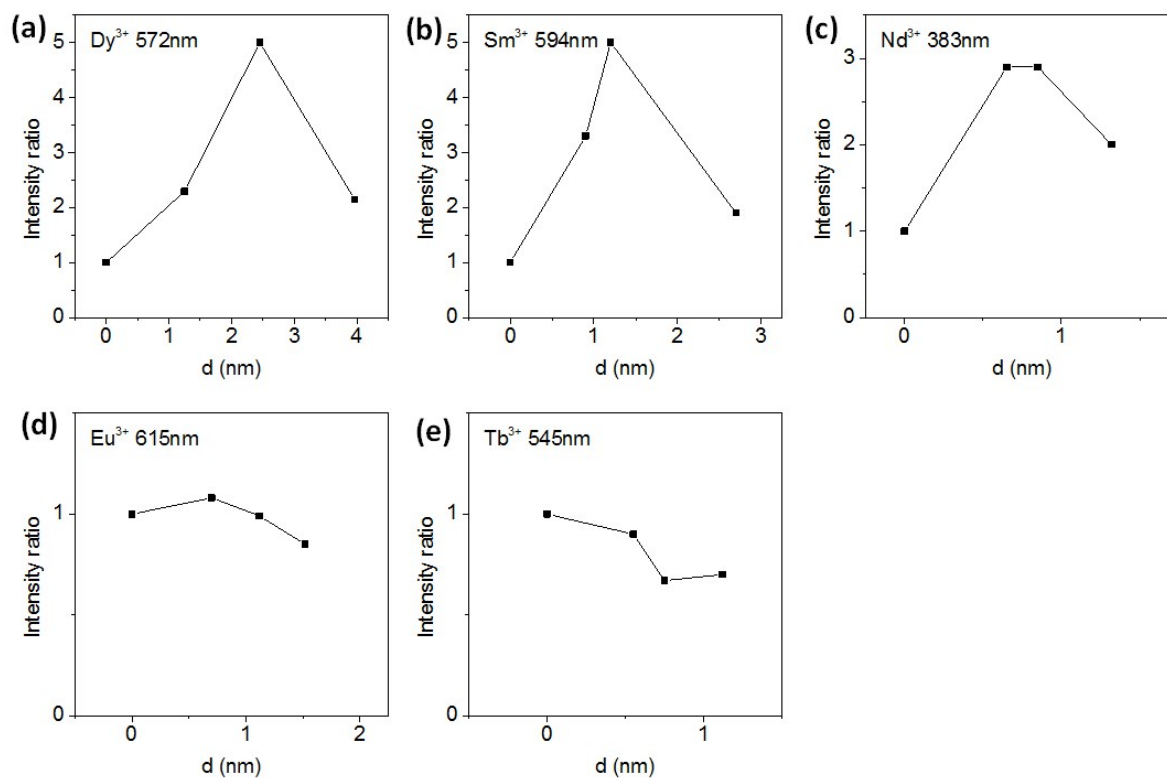

**Figure S3.** (a-e) Dependence of the typical upconversion emission intensity of (a)  $\text{Dy}^{3+}$  (572 nm), (b)  $\text{Sm}^{3+}$  (594 nm), (c)  $\text{Nd}^{3+}$  (383 nm), (d)  $\text{Eu}^{3+}$  (615 nm) and (e)  $\text{Tb}^{3+}$  (545 nm) on interlayer thickness for the  $\text{NaGdF}_4:\text{Yb/Tm}@\text{NaGdF}_4@\text{NaGdF}_4:\text{A}$  ( $\text{A}=\text{Dy, Sm, Nd}$ ) core-shell-shell nanoparticles under 980 nm excitation, respectively.

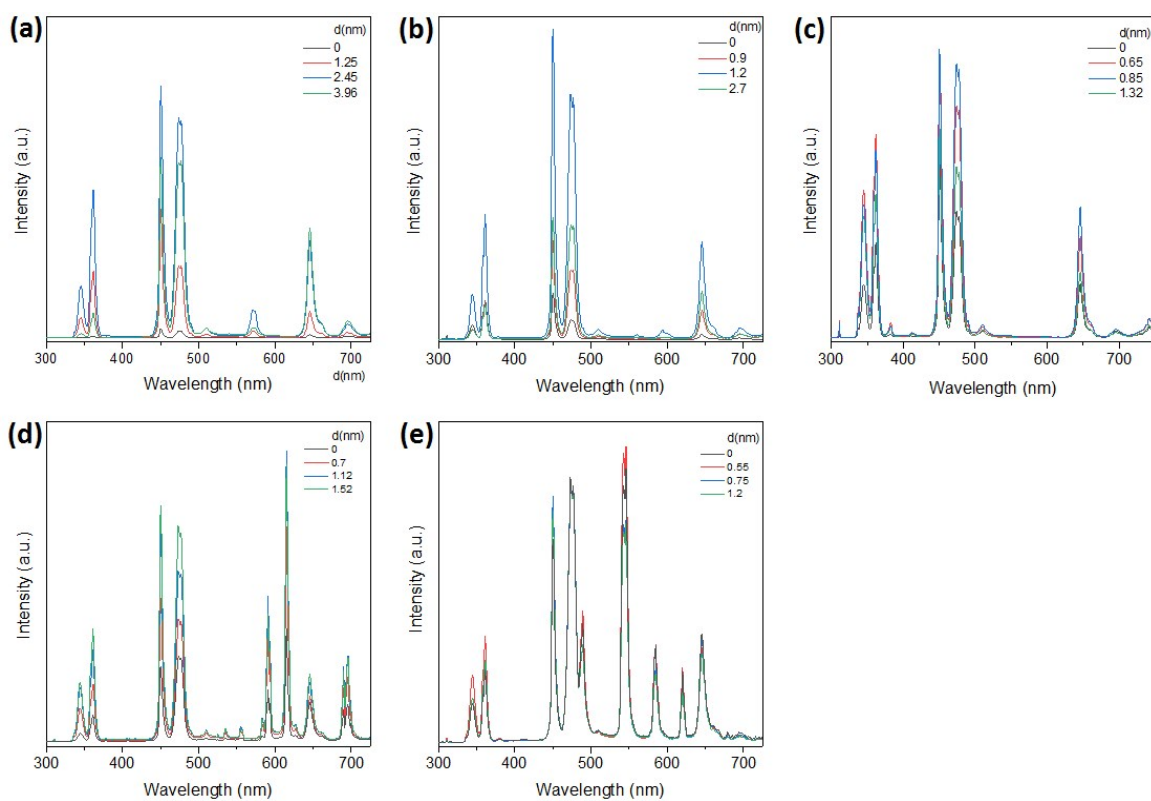

**Figure S4.** (a-e) Upconversion emission spectra recorded from the  $\text{NaGdF}_4:\text{Yb/Tm}@$   
 $\text{NaGdF}_4@\text{NaGdF}_4:\text{A}$  ( $\text{A}=\text{Dy}^{3+}, \text{Sm}^{3+}, \text{Nd}^{3+}, \text{Eu}^{3+}, \text{Tb}^{3+}$ ) core-shell-shell nanoparticles under  
980 nm excitation.

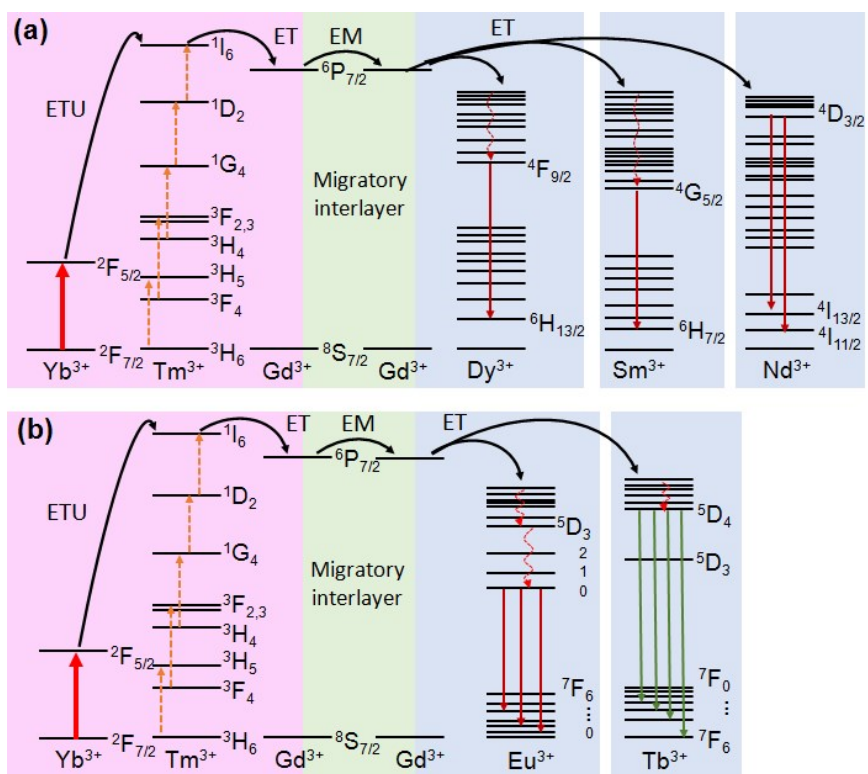

**Figure S5.** (a,b) Schematic of total energy transport process for photon upconversion in the NaGdF<sub>4</sub>:Yb/Tm@NaGdF<sub>4</sub>@NaGdF<sub>4</sub>:A (A=Dy<sup>3+</sup>, Sm<sup>3+</sup>, Nd<sup>3+</sup>, Eu<sup>3+</sup>, Tb<sup>3+</sup>) core-shell-shell nanoparticles under 980 nm excitation.

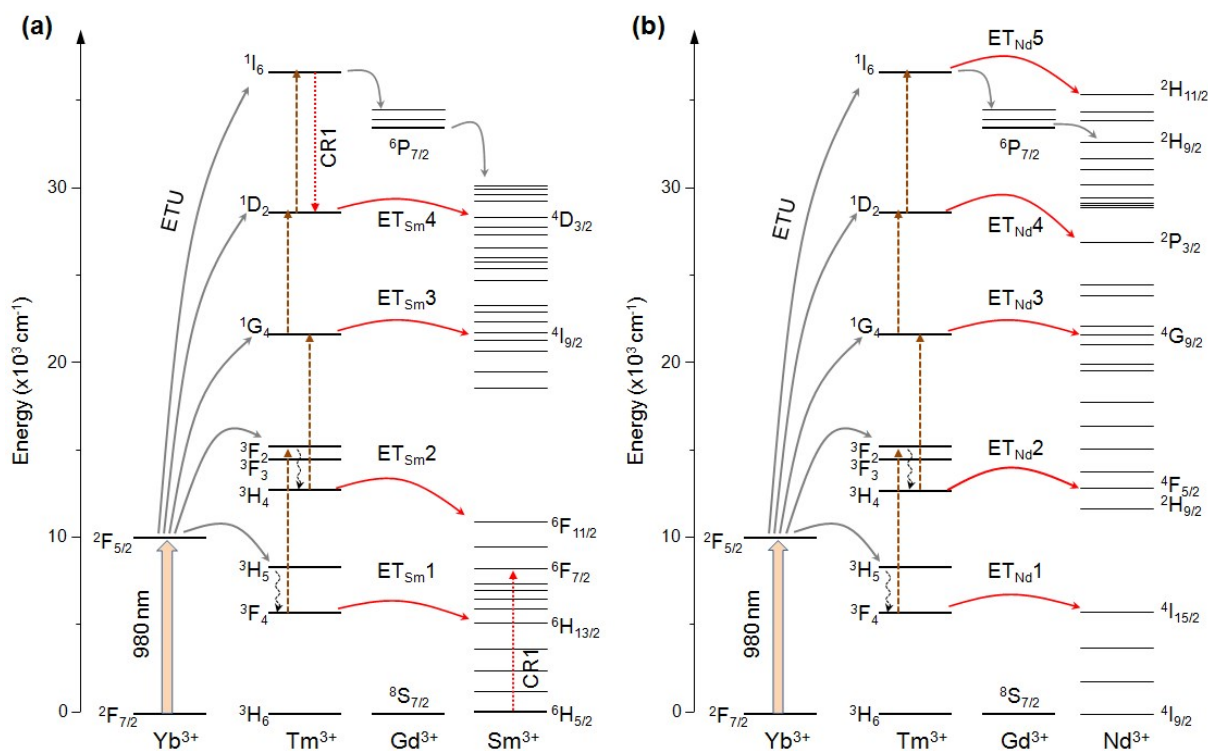

**Figure S6.** Schematic of possible quenching processes between  $\text{Tm}^{3+}$  and the emitters of (a)  $\text{Sm}^{3+}$  and (b)  $\text{Nd}^{3+}$  at interfacial region in the  $\text{NaGdF}_4:\text{Yb}/\text{Tm}@\text{NaGdF}_4:\text{A}$  ( $\text{A}=\text{Sm}, \text{Nd}$ ) core-shell nanoparticles under 980 nm excitation. Note that only the leading energy levels of the emitters are marked.  $\text{ET}_{\text{Sm}1}$ :  $\text{Tm}^{3+} ({}^3\text{F}_4) \rightarrow \text{Sm}^{3+} ({}^6\text{H}_{13/2})$ ,  $\text{ET}_{\text{Sm}2}$ :  $\text{Tm}^{3+} ({}^3\text{H}_4) \rightarrow \text{Sm}^{3+} ({}^6\text{F}_{11/2})$ ,  $\text{ET}_{\text{Sm}3}$ :  $\text{Tm}^{3+} ({}^1\text{G}_4) \rightarrow \text{Sm}^{3+} ({}^4\text{I}_{9/2})$ ,  $\text{ET}_{\text{Sm}4}$ :  $\text{Tm}^{3+} ({}^1\text{D}_2) \rightarrow \text{Sm}^{3+} ({}^4\text{D}_{3/2})$ ,  $\text{CR1}$ : [ $\text{Tm}^{3+} ({}^1\text{I}_6)$ ;  $\text{Sm}^{3+} ({}^6\text{H}_{5/2})$ ]  $\rightarrow$  [ $\text{Tm}^{3+} ({}^1\text{D}_2)$ ;  $\text{Sm}^{3+} ({}^6\text{F}_{7/2})$ ];  $\text{ET}_{\text{Nd}1}$ :  $\text{Tm}^{3+} ({}^3\text{F}_4) \rightarrow \text{Nd}^{3+} ({}^4\text{I}_{15/2})$ ,  $\text{ET}_{\text{Nd}2}$ :  $\text{Tm}^{3+} ({}^3\text{H}_4) \rightarrow \text{Nd}^{3+} ({}^4\text{F}_{5/2}, {}^2\text{H}_{9/2})$ ,  $\text{ET}_{\text{Nd}3}$ :  $\text{Tm}^{3+} ({}^1\text{G}_4) \rightarrow \text{Nd}^{3+} ({}^4\text{G}_{9/2})$ ,  $\text{ET}_{\text{Nd}4}$ :  $\text{Tm}^{3+} ({}^1\text{D}_2) \rightarrow \text{Nd}^{3+} ({}^2\text{P}_{3/2})$ ,  $\text{ET}_{\text{Nd}5}$ :  $\text{Tm}^{3+} ({}^1\text{I}_6) \rightarrow \text{Nd}^{3+} ({}^2\text{H}_{11/2})$ .



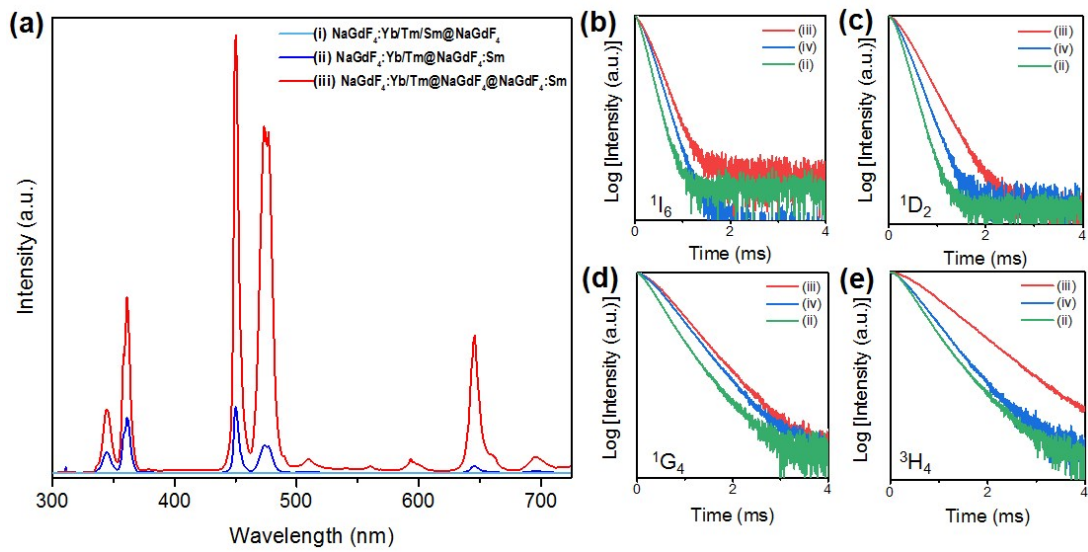

**Figure S7.** (a) Upconversion emission spectra of (i) NaGdF<sub>4</sub>:Yb/Tm/Sm@NaGdF<sub>4</sub> and (ii) NaGdF<sub>4</sub>:Yb/Tm@NaGdF<sub>4</sub>:Sm core-shell and (iii) NaGdF<sub>4</sub>:Yb/Tm@NaGdF<sub>4</sub>@NaGdF<sub>4</sub>:Sm core-shell-shell nanoparticles under 980 nm excitation. (b-e) The decay curves of Tm<sup>3+</sup> at its <sup>1</sup>I<sub>6</sub> (at 350 nm), <sup>1</sup>D<sub>2</sub> (at 362 nm), <sup>1</sup>G<sub>4</sub> (at 475 nm) and <sup>3</sup>H<sub>4</sub> (at 803 nm) states for the (iv) NaGdF<sub>4</sub>:Yb/Tm@NaGdF<sub>4</sub> and (ii) NaGdF<sub>4</sub>:Yb/Tm@NaGdF<sub>4</sub>:Sm core-shell and (iii) NaGdF<sub>4</sub>:Yb/Tm@NaGdF<sub>4</sub>@NaGdF<sub>4</sub>:Sm core-shell-shell nanoparticles under pulsed 980 nm excitation.
